# Supplementary material for: Perlin noise as a hierarchical neutral landscape model
Source: Copernicus journal article supplement (doi:10.5194/we-22-1-2022), 2022-02-09
Supplement: Supplementary file 1 [file we-22-1-2022-supplement.zip]

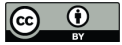

## *Supplement of*

# **Perlin noise as a hierarchical neutral landscape model**

**Thomas R. Etherington**

*Correspondence to:* Thomas R. Etherington ([etheringtont@landcareresearch.co.nz](mailto:etheringtont@landcareresearch.co.nz))

- [we-22-1-2022-supplement-title-page.pdf](#)
- [figure-1.py](#)
- [figure-2.py](#)

The copyright of individual parts of the supplement might differ from the article licence.
